# Supplementary material
Source: publisher figshare collection journal article supplement (https://gsapubs.figshare.com/ndownloader/files/25541732)
Supplement: Supplementary file 1 [file 25541732]

## Sheet: LA-ICP-MS
DR9: Full fayalite LA-ICP-MS data set
Sample	KL-24 190m																				KL-24 203m																			V6 395m
poistion	grain1 rim			grain1 core			grain1 core			grain1 core			grain1 rim				grain2 rim				outer rim			rim			core			core			rim			outer rim				rim			core			core			core
Spot	F1.1	σ	dl	F1.2	σ	dl	F1.3	σ	dl	F1.4	σ	dl	F1.5	σ	dl		F1.6	σ	dl		F2.1	σ	dl	F2.2	σ	dl	F2.3	σ	dl	F2.4	σ	dl	F2.5	σ	dl	F2.6	σ	dl		fa06-1	σ	dl	fa06-2	σ	dl	fa06-3	σ	dl	fa06-4
	ppm	ppm	ppm	ppm	ppm	ppm	ppm	ppm	ppm	ppm	ppm	ppm	ppm	ppm	ppm		ppm	ppm	ppm		ppm	ppm	ppm	ppm	ppm	ppm	ppm	ppm	ppm	ppm	ppm	ppm	ppm	ppm	ppm	ppm	ppm	ppm		ppm	ppm	ppm	ppm	ppm	ppm	ppm	ppm	ppm	ppm
Li	84.45	5.38	0.358	101.36	6.48	0.368	106.77	6.85	0.393	74.91	4.84	0.405	55.67	3.62	0.394		69.49	4.53	0.4		102.74	6.71	0.486	122.17	8.01	0.483	159.37	10.49	0.491	140.38	9.28	0.481	142.36	9.45	0.494	85.49	5.71	0.511		22.33	1.41	0.119	20.27	1.28	0.113	35.57	2.23	0.106	27.7
Na	<3.33	1.63	3.33	10.73	1.83	3.45	5.01	1.72	3.62	<3.76	1.74	3.76	<3.64	1.69	3.64		5.9	1.79	3.73		10.27	2.06	4.45	17.96	2.34	4.48	8.3	2.04	4.51	10.44	2.05	4.49	14.3	2.19	4.49	11.15	2.16	4.66		3.26	1.12	2.39	5.73	1.12	2.23	4.62	1.04	2.23	5.22
Al	2.88	0.18	0.111	3.52	0.21	0.112	3.3	0.2	0.136	2.6	0.17	0.12	2.71	0.17	0.121		3.11	0.19	0.129		3.41	0.2	0.144	3.61	0.22	0.164	3.31	0.2	0.161	4.11	0.23	0.139	3.82	0.22	0.158	3.11	0.19	0.157		4.07	0.21	0.197	3.86	0.21	0.184	3.95	0.2	0.17	3.94
P	38.77	6.13	2.45	52.51	8.23	2.5	49.72	7.84	2.66	36.25	5.82	2.6	39.91	6.41	2.64		39.16	6.33	2.62		43.71	7.08	3.18	49	7.94	3.22	56.15	9.09	3.2	52.39	8.53	3.18	62.27	10.14	3.19	32.7	5.55	3.46		51.1	2.8	1.6	48.3	2.7	1.42	43	2.4	1.43	43.7
K	<0.77	0.38	0.777	<0.8	0.38	0.803	<0.84	0.39	0.843	<0.87	0.4	0.876	<0.84	0.39	0.844		<0.86	0.41	0.869		<1	0.44	1	<1	0.44	1	<1	0.45	1	<1	0.44	1	<1	0.44	1	<1.1	0.46	1.1		<1.34	0.62	1.34	<1.25	0.6	1.25	<1.25	0.57	1.25	<1.34
Ca	1167.51	75.83	35.83	1272.25	82.33	37.45	1373.81	88.47	38.7	1230.08	80.21	39.72	1018.34	67.93	38.88		1027.02	68.89	39.86		1214	80.66	48.39	1018.79	69.44	49.44	1137.38	76.71	48.63	1078.63	73.2	49.18	1304.6	87.29	48.32	1079.29	74.11	49.9		717.61	44.11	60.13	723.18	43.91	56.01	724.61	42.71	56.64	715.61
Sc	55.99	3.47	0.0677	46.96	2.93	0.065	47.57	2.98	0.0674	67.95	4.27	0.0766	37.93	2.4	0.0801		65.17	4.14	0.0886		37.69	2.41	0.0925	72.22	4.63	0.0808	95.23	6.12	0.0906	83.93	5.43	0.0923	56.27	3.66	0.0984	36.31	2.38	0.0932		26.18	2.32	0.0916	21.38	1.9	0.0837	24.77	2.19	0.085	15.61
Ti	276.44	25.77	0.268	315.88	29.57	0.235	350.34	32.94	0.156	148.27	14.15	0.323	109.54	10.57	0.332		120.91	11.72	0.439		221.62	21.39	0.273	246.81	23.93	0.307	274.75	26.77	0.24	294.04	28.78	0.338	452.79	44.47	0.337	132.34	13.22	0.35		60.5	3.09	0.35	63.15	3.23	0.386	63.17	3.18	0.335	56.31
V	0.45	0.052	0.0264	0.352	0.043	0.0181	0.416	0.047	0.0203	0.482	0.053	0.0277	0.153	0.025	0.0176		0.314	0.039	0.0195		0.314	0.04	0.0343	0.477	0.052	0.0281	0.702	0.07	0.022	0.735	0.072	0.0282	0.49	0.053	0.0236	0.176	0.028	0.0245		0.208	0.026	0.0346	0.154	0.023	0.0305	0.186	0.024	0.0325	0.152
Cr	14.26	1.9	0.684	15.09	2.01	0.691	16.09	2.13	0.701	15.4	2.06	0.814	15.06	2.03	0.714		14.46	1.96	0.697		14.12	1.94	0.948	13.41	1.85	0.873	14.31	1.97	0.851	14.67	2.03	0.957	14.66	2.03	0.847	15.2	2.12	0.93		8.52	0.81	0.822	8.36	0.79	0.738	8.03	0.74	0.703	8.37
Mn	18222.2	1020.19	0.144	18414.9	1035.39	0.157	18001.2	1016.46	0.146	18132.6	1028.26	0.158	17487.3	995.93	0.156		18993.5	1086.36	0.153		19124	1098.48	0.182	18905.6	1090.59	0.192	18822.3	1090.44	0.182	18994.2	1105.09	0.181	18490.7	1080.42	0.173	19237.6	1128.88	0.185		9308.36	372.29	0.128	9254.68	370.15	0.132	9349.97	373.92	0.154	9269.88
Co	21.66	1.38	0.023	22.62	1.45	0.0151	21.94	1.41	0.0238	22.3	1.44	0.0201	23.76	1.54	0.021		23.44	1.53	0.0182		21.97	1.44	0.017	21.8	1.43	0.0241	22.22	1.47	0.0263	21.38	1.42	0.0221	21.87	1.46	0.014	22.26	1.49	0.0205		17.43	0.74	0.0243	16.64	0.71	0.0184	16.96	0.72	0.0269	16.97
Ni	7.52	0.63	0.153	7.02	0.6	0.177	6.98	0.59	0.182	7.38	0.62	0.188	7.81	0.66	0.197		8.28	0.69	0.187		6.13	0.54	0.234	6.78	0.58	0.184	6.36	0.55	0.191	6.48	0.56	0.222	6.02	0.53	0.244	5.64	0.51	0.249		3.59	0.24	0.217	3.35	0.23	0.203	3.76	0.23	0.185	3.61
Cu	0.177	0.076	0.137	<0.163	0.077	0.163	<0.157	0.076	0.157	<0.165	0.078	0.165	<0.154	0.07	0.154		<0.166	0.078	0.166		0.255	0.085	0.172	<0.190	0.082	0.19	0.184	0.086	0.183	<0.193	0.083	0.193	<0.199	0.083	0.199	<0.212	0.089	0.212		<0.117	0.052	0.117	<0.108	0.051	0.108	<0.102	0.049	0.102	<0.104
Zn	449.9	95.25	0.5	461.94	98.36	1.11	453.6	97.15	1.11	478.98	103.17	1.04	473.44	102.58	0.974		470.27	102.5	0.864		494.33	108.34	1.04	488.45	107.68	1.17	496.78	110.15	0.527	466.01	103.92	0.856	471.57	105.78	1.05	494.24	111.5	1.47		394.66	21.39	0.843	403.81	21.91	0.621	404.47	21.83	0.698	409.36
Rb	0.127	0.025	0.0281	0.167	0.028	0.0292	0.176	0.03	0.0372	0.14	0.025	0.028	0.063	0.019	0.0278		0.122	0.027	0.0382		0.165	0.028	0.0377	0.121	0.027	0.0426	0.313	0.039	0.0338	0.272	0.037	0.0435	0.258	0.033	0.0238	0.078	0.023	0.0419		0.052	0.017	0.0254	<0.024	0.014	0.0243	0.038	0.013	0.0215	0.026
Sr	0.137	0.019	0.00457	0.221	0.026	0.00475	0.235	0.026	<0.00000	0.184	0.022	<0.00000	0.05	0.011	0.00863		0.155	0.02	0.0051		0.145	0.019	0.00868	0.231	0.026	0.0107	0.427	0.04	0.00879	0.311	0.031	0.0107	0.287	0.03	0.00618	0.115	0.017	0.0128		0.082	0.015	0.0122	0.068	0.015	0.0143	0.04	0.01	0.0126	0.049
Y	288.02	22.05	0.00621	518.16	39.85	0.00646	533.96	41.27	0.00828	260.79	20.27	<0.00000	106.01	8.29	0.00677		190.77	14.98	0.00694		347.83	27.44	0.0059	278.22	22.06	0.00593	639.25	50.93	0.012	398.31	31.9	0.00842	714.12	57.46	0.0119	165.06	13.36	<0.00000		96.78	5.01	0.014	68.36	3.55	0.0116	75.64	3.92	0.0235	64.68
Zr	22.32	1.39	<0.00000	36.81	2.29	0.00877	39.28	2.45	0.00919	25.47	1.61	<0.00000	38.87	2.45	0.00921		50.16	3.16	0.00943		26.86	1.71	0.0113	75.98	4.82	0.0161	79.87	5.09	0.0115	75.39	4.83	0.0115	49.32	3.18	0.0114	24.55	1.6	0.0168		5.53	0.31	0.0209	13.11	0.67	0.0251	12.04	0.61	0.0197	10.88
Nb	74.63	5.91	0.0075	142.27	11.32	<0.00000	170.44	13.62	0.00577	61.94	4.99	<0.00000	89.48	7.23	<0.00000		110.06	8.94	<0.00000		135.9	11.09	0.00712	249.97	20.49	<0.00000	252.45	20.8	<0.00000	245.75	20.35	0.0144	275.65	22.95	<0.00000	75.85	6.36	<0.00000		nd			nd			nd			nd
La	0.0022	0.0022	<0.00000	0.0021	0.0021	<0.00000	<0.0071	0.0035	0.0071	<0.00	<0.00	<0.00000	0.0059	0.0034	<0.00000		<0.00	<0.00	<0.00000		0.0055	0.0032	<0.00000	<0.0062	0.0037	0.00624	<0.0109	0.0038	0.0109	<0.0063	0.0026	0.00626	0.0071	0.0036	<0.00000	<0.0065	0.0033	0.00648		<0.0142	0.0044	0.0142	<0.0115	0.0068	0.0115	<0.0164	0.0061	0.0164	<0.0182
Ce	0.041	0.01	<0.00000	0.061	0.013	<0.00000	0.067	0.013	0.00496	0.0268	0.0076	<0.00000	0.016	0.0059	0.00497		0.038	0.0095	<0.00000		0.063	0.012	<0.00000	0.0417	0.0096	<0.00000	0.0347	0.0087	<0.00000	0.0336	0.0082	<0.00000	0.098	0.016	<0.00000	0.0176	0.0076	0.0111		<0.0103	0.006	0.0103	0.0177	0.0071	0.00552	<0.0112	0.0063	0.0112	<0.0138
Pr	0.0136	0.0049	<0.00000	0.0221	0.0065	0.00375	0.02	0.0046	0.00393	0.0106	0.0041	<0.00000	0.0112	0.0046	0.00393		0.0237	0.0063	<0.00000		0.0213	0.0064	0.00685	0.008	0.003	<0.00000	0.0159	0.0049	<0.00000	0.0105	0.0043	0.00488	0.0303	0.0068	<0.00000	<0.0071	0.0042	0.00715		0.012	0.004	0.0124	<0.0141	0.0064	0.0141	0.0087	0.0044	0.00476	<0.0091
Nd	0.11	0.034	<0.00000	0.204	0.047	<0.00000	0.208	0.046	<0.00000	0.097	0.03	<0.00000	0.054	0.024	0.023		0.148	0.039	<0.00000		0.184	0.042	<0.00000	0.075	0.031	0.0403	0.085	0.028	<0.00000	0.086	0.027	<0.00000	0.371	0.063	0.0285	0.032	0.015	<0.00000		0.062	0.031	0.031	<0.065	0.041	0.0645	<0.058	0.028	0.0584	0.062
Sm	0.173	0.047	0.0239	0.3	0.061	0.0248	0.5	0.077	<0.00000	0.272	0.056	0.0269	0.072	0.027	<0.00000		0.141	0.043	0.0377		0.227	0.048	<0.00000	0.228	0.048	<0.00000	0.22	0.05	0.0325	0.158	0.038	<0.00000	0.456	0.07	<0.00000	0.103	0.035	0.0334		0.057	0.033	0.0525	0.135	0.054	0.0598	0.112	0.038	<0.00000	<0.095
Eu	0.0069	0.0055	0.00627	0.019	0.0087	0.0092	0.0214	0.0077	<0.00000	0.0236	0.008	<0.00000	0.0134	0.0061	<0.00000		<0.0070	0.0044	0.00699		0.0124	0.0056	<0.00000	0.0148	0.0072	0.00845	<0.0120	0.0051	0.012	0.0089	0.0058	0.00847	0.0261	0.0089	0.00845	0.0099	0.005	<0.00000		0.011	0.0075	0.00897	<0.0118	0.0063	0.0118	0.012	0.006	<0.00000	0.0106
Gd	1.46	0.16	0.0238	2.08	0.2	<0.00000	1.99	0.19	<0.00000	0.97	0.12	<0.00000	0.522	0.082	0.0259		0.77	0.1	<0.00000		1.48	0.15	<0.00000	0.79	0.1	<0.00000	1.25	0.14	0.0324	1.26	0.14	<0.00000	2.79	0.25	<0.00000	0.8	0.1	<0.00000		0.406	0.087	0.0759	0.322	0.083	0.0863	0.252	0.07	0.0873	0.225
Tb	0.869	0.058	<0.00000	1.278	0.08	0.00352	1.4	0.085	<0.00000	0.696	0.048	0.00381	0.308	0.027	<0.00000		0.515	0.039	0.00378		1.03	0.066	0.00455	0.521	0.038	<0.00000	0.83	0.055	<0.00000	0.679	0.046	0.00459	1.643	0.099	0.00458	0.441	0.034	<0.00000		0.236	0.026	0.0148	0.182	0.022	0.00521	0.184	0.021	0.0129	0.185
Dy	15.35	1.26	<0.00000	23.39	1.91	<0.00000	24.19	1.98	0.0273	12.76	1.07	<0.00000	5.12	0.45	<0.00000		9.52	0.81	<0.00000		19.53	1.64	0.0195	10.8	0.92	0.0196	19.66	1.66	<0.00000	15.62	1.33	<0.00000	30.64	2.6	0.0196	8.43	0.74	<0.00000		4.7	0.34	0.0475	3.26	0.26	0.0312	3.28	0.25	0.0386	3.14
Ho	7.9	0.46	0.00519	11.84	0.68	0.00382	11.81	0.68	<0.00000	7.1	0.42	<0.00000	2.79	0.17	0.00566		5.29	0.32	<0.00000		9.82	0.58	<0.00000	7.3	0.44	<0.00000	13.32	0.79	<0.00000	10.75	0.64	0.00498	14.78	0.88	<0.00000	4.52	0.28	<0.00000		2.48	0.16	0.012	1.75	0.12	0.0177	1.84	0.12	0.00565	1.69
Er	59.81	5.23	<0.00000	80.06	7.03	0.011	81.53	7.19	0.0163	56.3	5	0.0119	21.25	1.91	<0.00000		43.45	3.91	0.0167		69.15	6.23	<0.00000	72.85	6.59	0.0143	120.55	10.95	<0.00000	98.61	9.01	0.0143	104.03	9.55	0.0202	36.34	3.37	0.0148		19.44	0.99	0.0528	12.73	0.68	0.0432	14.21	0.73	0.0286	11.94
Tm	21.1	1.18	0.00347	26.3	1.48	<0.00000	27.3	1.54	<0.00000	21.55	1.22	0.0039	8.52	0.49	<0.00000		17.67	1.01	0.00387		24.65	1.41	<0.00000	32.33	1.86	<0.00000	49.99	2.88	0.00666	41.61	2.4	<0.00000	35.69	2.07	0.00468	13.78	0.81	<0.00000		7.16	0.4	0.00995	4.69	0.27	0.0119	5.05	0.28	0.0121	4.36
Yb	269.88	22.14	<0.00000	318.74	26.27	<0.00000	332.77	27.56	<0.00000	294.71	24.54	<0.00000	124.72	10.46	<0.00000		270.6	22.76	<0.00000		310.76	26.26	<0.00000	491.65	41.73	<0.00000	710.33	60.58	<0.00000	603.35	51.71	<0.00000	437.24	37.67	0.0307	199.75	17.32	0.0318		92.04	6.32	0.0445	60.4	4.18	0.0413	64.12	4.42	0.0483	55.27
Lu	55.6	3.88	0.0036	62.58	4.39	<0.00000	64.14	4.52	<0.00000	67.29	4.77	0.00404	36.53	2.6	<0.00000		73.23	5.24	0.00401		63.22	4.54	0.00482	122.41	8.83	0.00485	154.76	11.21	0.00489	139.41	10.15	0.00486	82.91	6.07	0.00485	49.61	3.65	<0.00000		20.19	1.26	0.0103	13.81	0.87	0.011	14.94	0.93	0.0125	11.56
Hf	0.68	0.07	<0.00000	0.976	0.091	<0.00000	0.956	0.088	0.00917	0.912	0.085	0.0134	1.75	0.15	0.0159		1.85	0.15	<0.00000		0.751	0.073	<0.00000	2.23	0.18	<0.00000	2.37	0.19	<0.00000	2.13	0.17	0.0161	1.25	0.11	0.0161	0.88	0.083	<0.00000
Ta	1.542	0.091	0.00306	3.26	0.18	0.0045	3.31	0.18	0.00333	1.75	0.1	0.00344	2.98	0.17	<0.00000		3.11	0.17	0.00483		2.39	0.14	<0.00000	6.26	0.34	0.00413	6.4	0.35	<0.00000	6.28	0.34	<0.00000	4.99	0.27	0.00414	2.11	0.12	<0.00000
Pb	0.096	0.018	0.00741	0.059	0.014	0.0122	0.055	0.013	0.00986	0.052	0.012	0.0102	0.06	0.015	0.0161		0.169	0.025	0.0117		0.061	0.015	0.0186	0.066	0.014	0.0122	0.044	0.012	0.0159	0.094	0.018	0.02	0.066	0.013	0.00997	0.139	0.021	0.00732
Th	<0.0028	0.0016	0.00279	<0.0029	0.0016	0.0029	<0.00303	0.00093	0.00303	<0.0031	0.0015	0.00313	<0.0043	0.0021	0.00429		<0.00311	0.00096	0.00311		<0.0084	0.0028	0.00835	<0.0065	0.0025	0.00651	<0.0038	0.002	0.00378	<0.00	<0.00	<0.00000	<0.0038	0.0024	0.00376	<0.0055	0.0017	0.00551
U	0.112	0.013	<0.00000	0.259	0.022	<0.00000	0.321	0.025	0.00467	0.0635	0.0094	0.00737	0.0647	0.009	<0.00000		0.099	0.012	0.00276		0.196	0.017	<0.00000	0.193	0.017	0.00472	0.344	0.026	<0.00000	0.304	0.023	0.00335	0.502	0.035	<0.00000	0.0507	0.008	0.006
nd: not detected
[truncated: 89 more columns]

## Sheet: EPMA
Spot	Sample	SiO2	TiO2	Al2O3	Cr2O3	FeO	MnO	MgO	NiO	CaO	Total
		wt. %	wt. %	wt. %	wt. %	wt. %	wt. %	wt. %	wt. %	wt. %	wt. %
Kl24_190m_F1.1	KL24_190m	28.943	0.07	0.014	0	67.66	1.377	0.65	0.006	0.151	98.917
Kl24_190m_F1.2	KL24_190m	28.914	0	0.008	0	68.247	1.361	0.614	0	0.175	99.319
Kl24_190m_F1.3	KL24_190m	28.791	0.03	0	0.005	68.046	1.455	0.644	0	0.142	99.113
Kl24_190m_F1.4	KL24_190m	28.761	0.014	0	0	67.452	1.453	0.617	0	0.163	98.46
Kl24_190m_F1.5	KL24_190m	28.947	0.039	0	0	68.364	1.404	0.613	0	0.139	99.537
Kl24_190m_F1.6	KL24_190m	29.01	0.014	0.001	0.002	67.807	1.407	0.633	0	0.151	99.037
Kl24_190m_F1.7	KL24_190m	29.235	0	0	0	68.755	1.393	0.708	0.009	0.204	100.318
Kl24_190m_F1.8	KL24_190m	28.998	0.061	0	0.021	68.756	1.457	0.626	0	0.188	100.116
Kl24_190m_F1.9	KL24_190m	28.85	0.031	0	0.021	68.239	1.458	0.616	0	0.167	99.402
Kl24_190m_F1.10	KL24_190m	29.313	0	0	0	67.779	1.477	0.572	0	0.166	99.317
Kl24_190m_F1.11	KL24_190m	29.183	0.032	0.011	0	68.032	1.434	0.625	0.011	0.176	99.504
Kl24_190m_F1.12	KL24_190m	29.168	0.007	0	0.023	67.58	1.346	0.685	0.016	0.18	99.005
Kl24_190m_F1.13	KL24_190m	29.054	0.026	0.017	0	68.389	1.485	0.634	0.031	0.18	99.833
Kl24_190m_F1.14	KL24_190m	28.966	0.032	0	0	67.492	1.437	0.671	0.027	0.209	98.834
Kl24_190m_F1.15	KL24_190m	29.261	0.02	0	0	68.304	1.448	0.643	0	0.172	99.872
Kl24_190m_F1.16	KL24_190m	29.318	0.053	0.004	0	67.53	1.439	0.583	0	0.189	99.149
Kl24_190m_F1.17	KL24_190m	29.449	0.056	0	0	67.936	1.507	0.618	0	0.182	99.778
Kl24_190m_F1.18	KL24_190m	29.495	0.05	0.023	0.011	68.017	1.443	0.658	0	0.219	99.948
Kl24_190m_F1.19	KL24_190m	29.758	0.08	0	0.01	67.746	1.474	0.635	0	0.278	100.008
Kl24_190m_F1.20	KL24_190m	29.681	0.011	0	0	67.945	1.434	0.609	0.025	0.205	99.935
Kl24_190m_F1.21	KL24_190m	29.099	0.046	0.004	0	68.206	1.446	0.63	0.022	0.211	99.67
Kl24_190m_F1.22	KL24_190m	28.984	0.035	0.002	0.012	68.962	1.44	0.622	0	0.159	100.216
Kl24_190m_F1.23	KL24_190m	29.003	0.001	0.007	0	68.142	1.428	0.608	0.007	0.153	99.372
Kl24_190m_F1.24	KL24_190m	28.978	0.006	0.017	0	68.256	1.425	0.686	0.015	0.162	99.574
Kl24_190m_F1.25	KL24_190m	29.043	0	0.003	0	68.738	1.384	0.663	0.005	0.161	100.023
Kl24_190m_F1.26	KL24_190m	29.129	0	0.006	0.025	68.083	1.445	0.668	0.02	0.144	99.52
Kl24_190m_F1.27	KL24_190m	29.193	0	0.011	0.016	67.775	1.448	0.648	0	0.164	99.256
Kl24_190m_F1.28	KL24_190m	29.647	0.02	0	0.004	68.39	1.465	0.662	0.008	0.173	100.369
Kl24_190m_F1.29	KL24_190m	29.587	0.071	0	0	68.017	1.403	0.637	0	0.157	99.872
Kl24_190m_F1.30	KL24_190m	28.978	0.011	0	0.005	67.991	1.403	0.578	0	0.164	99.15
Kl24_190m_F1.31	KL24_190m	29.19	0.01	0.003	0.005	68.597	1.356	0.6	0.034	0.183	100.021
Kl24_190m_F1.32	KL24_190m	29.32	0.043	0	0	68.249	1.469	0.635	0	0.198	99.925
Kl24_190m_F1.33	KL24_190m	29.164	0.037	0	0.001	67.804	1.42	0.58	0	0.215	99.221
Kl24_190m_F1.34	KL24_190m	29.669	0.024	0	0	68.168	1.353	0.623	0	0.154	100.01
Kl24_190m_F1.35	KL24_190m	29.48	0.028	0	0	68.262	1.359	0.6	0.049	0.204	100.007
Kl24_190m_F1.36	KL24_190m	29.859	0.044	0	0	68.537	1.379	0.631	0.021	0.177	100.691
Kl24_190m_F1.37	KL24_190m	30.112	0.014	0.009	0	68.762	1.425	0.584	0	0.155	101.081
Kl24_190m_F1.38	KL24_190m	30.098	0.017	0.012	0	68.329	1.324	0.622	0.002	0.181	100.633
Kl24_190m_F1.39	KL24_190m	29.978	0.039	0	0.024	67.897	1.418	0.657	0	0.206	100.269
Kl24_190m_F1.40	KL24_190m	29.96	0.011	0	0	68.808	1.362	0.647	0.009	0.16	101.029
Kl24_203m_F2.1	KL24_203m	29.581	0	0.012	0	68.21	1.498	0.673	0.002	0.154	100.167
Kl24_203m_F2.2	KL24_203m	29.845	0.004	0	0	68.617	1.407	0.714	0	0.169	100.768
Kl24_203m_F2.3	KL24_203m	30.126	0.003	0	0	68.962	1.395	0.656	0	0.175	101.367
Kl24_203m_F2.4	KL24_203m	29.777	0	0.025	0	68.41	1.401	0.628	0	0.152	100.406
Kl24_203m_F2.5	KL24_203m	30.066	0.037	0.002	0.011	68.476	1.406	0.67	0	0.163	100.839
Kl24_203m_F2.6	KL24_203m	30.04	0.011	0	0.007	68.281	1.369	0.63	0.01	0.175	100.574
Kl24_203m_F2.7	KL24_203m	30.133	0.079	0	0	68.542	1.392	0.68	0.009	0.143	100.985
Kl24_203m_F2.8	KL24_203m	30.263	0	0.002	0.003	68.064	1.419	0.637	0	0.189	100.606
Kl24_203m_F2.9	KL24_203m	29.925	0.029	0	0	68.268	1.4	0.639	0	0.132	100.418
Kl24_203m_F2.10	KL24_203m	30.097	0.023	0.005	0.004	68.152	1.413	0.643	0	0.168	100.518
Kl24_203m_F2.11	KL24_203m	30.088	0.038	0	0.002	68.228	1.462	0.687	0	0.189	100.726
Kl24_203m_F2.12	KL24_203m	30.02	0.039	0	0.016	68.593	1.405	0.643	0.031	0.171	100.94
Kl24_203m_F2.13	KL24_203m	30.108	0	0.008	0	68.911	1.385	0.676	0	0.149	101.256
Kl24_203m_F2.14	KL24_203m	30.027	0	0	0	68.634	1.379	0.638	0	0.141	100.846
Kl24_203m_F2.15	KL24_203m	30.168	0.075	0.033	0	68.526	1.434	0.677	0	0.148	101.098
Kl24_203m_F2.16	KL24_203m	29.981	0	0	0	68.892	1.365	0.663	0.015	0.172	101.112
Kl24_203m_F2.17	KL24_203m	30.001	0.065	0.004	0	69.116	1.378	0.632	0	0.16	101.376
Kl24_203m_F2.18	KL24_203m	30.08	0	0	0	68.845	1.343	0.627	0.011	0.177	101.1
Kl24_203m_F2.19	KL24_203m	29.735	0	0	0	68.423	1.438	0.629	0.005	0.181	100.411
Line 1 395m Fa.2	V6 395 m Fa.2	29.831	0	0.005	0	68.736	1.401	0.582	0	0.122	100.677
Line 2 395m Fa.2	V6 395 m Fa.2	29.811	0	0.001	0	68.868	1.469	0.595	0	0.109	100.863
Line 3 395m Fa.2	V6 395 m Fa.2	29.695	0.037	0	0	68.735	1.402	0.63	0.007	0.142	100.648
Line 4 395m Fa.2	V6 395 m Fa.2	30.073	0.017	0.008	0.01	69.131	1.386	0.616	0	0.136	101.377
Line 5 395m Fa.2	V6 395 m Fa.2	29.901	0.011	0	0	68.418	1.341	0.583	0	0.248	100.505
Line 6 395m Fa.2	V6 395 m Fa.2	29.755	0	0.031	0	68.793	1.385	0.577	0	0.107	100.648
Line 7 395m Fa.2	V6 395 m Fa.2	29.672	0	0	0	68.241	1.299	0.628	0	0.088	99.93
Line 8 395m Fa.2	V6 395 m Fa.2	29.588	0	0.003	0	68.768	1.3	0.619	0.007	0.136	100.437
Line 9 395m Fa.2	V6 395 m Fa.2	29.802	0.029	0	0	68.576	1.366	0.566	0.006	0.129	100.474
Line 10 395m Fa.2	V6 395 m Fa.2	29.89	0	0.008	0	68.891	1.375	0.597	0	0.109	100.872
Line 1 395m Fa.3	V6 395 m Fa.3	28.967	0	0.002	0	68.767	1.353	0.605	0.002	0.11	99.806
Line 2 395m Fa.3	V6 395 m Fa.3	28.79	0	0.005	0	69.315	1.393	0.586	0	0.102	100.206
Line 3 395m Fa.3	V6 395 m Fa.3	28.867	0	0	0.002	68.044	1.361	0.549	0	0.112	98.935
Line 4 395m Fa.3	V6 395 m Fa.3	28.994	0.058	0	0	68.664	1.405	0.613	0	0.119	99.853
Line 5 395m Fa.3	V6 395 m Fa.3	29.573	0	0.01	0	68.542	1.419	0.608	0	0.092	100.244
Line 6 395m Fa.3	V6 395 m Fa.3	29.785	0	0	0	68.86	1.37	0.573	0	0.114	100.702
Line 7 395m Fa.3	V6 395 m Fa.3	29.162	0	0.014	0.002	68.782	1.366	0.63	0	0.102	100.058
Line 8 395m Fa.3	V6 395 m Fa.3	28.962	0.002	0.041	0	68.482	1.296	0.628	0.001	0.12	99.532
Line 9 395m Fa.3	V6 395 m Fa.3	29.424	0.004	0.002	0	69.217	1.38	0.579	0	0.137	100.766
Line 10 395m Fa.3	V6 395 m Fa.3	29.595	0	0.007	0	69.239	1.357	0.629	0	0.1	100.927
Line 11 395m Fa.3	V6 395 m Fa.3	29.635	0	0	0	68.577	1.343	0.575	0	0.091	100.221
Line 12 395m Fa.3	V6 395 m Fa.3	29.993	0	0	0	68.976	1.415	0.633	0	0.124	101.141
Line 13 395m Fa.3	V6 395 m Fa.3	29.579	0.018	0	0	68.307	1.419	0.594	0.001	0.118	100.043
Line 14 395m Fa.3	V6 395 m Fa.3	29.643	0	0	0	68.53	1.494	0.503	0	0.11	100.28
Line 15 395m Fa.3	V6 395 m Fa.3	29.952	0.009	0.009	0	68.753	1.357	0.608	0	0.115	100.803
Line 15 395m Fa.3	V6 395 m Fa.3	30.04	0	0.012	0.002	68.365	1.353	0.633	0	0.128	100.539
Line 1 395_fa6	V6 395 m Fa.6	29.546	0	0	0	68.43	1.242	0.552	0	0.114	99.926
Line 2 395_fa6	V6 395 m Fa.6	29.419	0	0	0.008	68.715	1.38	0.65	0.009	0.093	100.299
Line 3 395_fa6	V6 395 m Fa.6	29.452	0.013	0	0.032	69.162	1.313	0.599	0.016	0.133	100.766
Line 4 395_fa6	V6 395 m Fa.6	29.514	0.008	0	0.001	68.845	1.379	0.573	0.011	0.109	100.44
Line 5 395_fa6	V6 395 m Fa.6	29.395	0.044	0.012	0.021	69.277	1.469	0.605	0	0.093	100.947
Line 6 395_fa6	V6 395 m Fa.6	29.793	0.012	0	0	68.547	1.355	0.598	0	0.132	100.459
Line 7 395_fa6	V6 395 m Fa.6	29.921	0	0.004	0.026	68.708	1.32	0.6	0	0.11	100.726
Line 8 395_fa6	V6 395 m Fa.6	29.602	0	0.009	0	69.028	1.31	0.568	0.008	0.084	100.624
Line 9 395_fa6	V6 395 m Fa.6	29.223	0.009	0.002	0	68.533	1.318	0.604	0.016	0.096	99.801
Line 10 395_fa6	V6 395 m Fa.6	29.505	0.017	0.001	0.01	68.813	1.383	0.618	0	0.119	100.474
Line 11 395_fa6	V6 395 m Fa.6	29.444	0.046	0	0	68.65	1.286	0.569	0.009	0.083	100.144
Line 12 395_fa6	V6 395 m Fa.6	29.477	0	0.004	0.008	69.494	1.322	0.574	0	0.127	101.006
Line 13 395_fa6	V6 395 m Fa.6	29.447	0.005	0.004	0	69.395	1.265	0.593	0.006	0.154	100.905
Line 14 395_fa6	V6 395 m Fa.6	29.332	0.004	0.007	0	68.508	1.33	0.612	0	0.142	99.943
Line 15 395_fa6	V6 395 m Fa.6	29.315	0.005	0.014	0.008	68.548	1.375	0.588	0	0.121	99.974
Line 16 395_fa6	V6 395 m Fa.6	29.276	0.044	0.006	0.011	69.078	1.387	0.588	0	0.124	100.56
Line 17 395_fa6	V6 395 m Fa.6	29.372	0	0.007	0	68.705	1.349	0.543	0.016	0.089	100.081
Line 18 395_fa6	V6 395 m Fa.6	29.458	0	0.004	0	68.705	1.359	0.625	0	0.12	100.273
Line 19 395_fa6	V6 395 m Fa.6	29.735	0.01	0	0.01	69.201	1.344	0.607	0	0.138	101.097
Line 20 395_fa6	V6 395 m Fa.6	29.599	0.014	0.001	0	68.958	1.383	0.613	0	0.114	100.695
Line 21 395_fa6	V6 395 m Fa.6	29.722	0	0	0	69.109	1.329	0.599	0	0.113	100.884
Line 22 395_fa6	V6 395 m Fa.6	30.079	0	0.001	0	69.032	1.351	0.633	0	0.123	101.224
Line 23 395_fa6	V6 395 m Fa.6	29.924	0.007	0.001	0	68.71	1.399	0.587	0	0.132	100.816
Line 24 395_fa6	V6 395 m Fa.6	29.818	0	0	0	69.028	1.288	0.617	0.008	0.096	100.89
Line 25 395_fa6	V6 395 m Fa.6	29.751	0	0.013	0.017	68.762	1.314	0.653	0.001	0.129	100.654
Line 26 395_fa6	V6 395 m Fa.6	29.813	0.033	0.007	0.009	68.702	1.332	0.622	0	0.121	100.657
Line 27 395_fa6	V6 395 m Fa.6	29.8	0	0	0	69.471	1.388	0.63	0.001	0.096	101.406
Line 28 395_fa6	V6 395 m Fa.6	30.024	0.032	0	0	68.528	1.309	0.571	0.02	0.095	100.579
Line 29 395_fa6	V6 395 m Fa.6	29.487	0.058	0	0	68.405	1.349	0.573	0.034	0.108	100.016
Line 30 395_fa6	V6 395 m Fa.6	29.586	0	0.001	0	68.476	1.402	0.562	0.005	0.124	100.178
Line 31 395_fa6	V6 395 m Fa.6	29.655	0.02	0.005	0	69.192	1.286	0.616	0	0.107	100.917
Line 32 395_fa6	V6 395 m Fa.6	29.688	0	0.001	0.004	69.086	1.378	0.599	0.009	0.114	100.906
Line 33 395_fa6	V6 395 m Fa.6	30.039	0	0.001	0	69.11	1.369	0.604	0	0.119	101.274
Line 34 395_fa6	V6 395 m Fa.6	30.145	0.021	0.018	0	69.051	1.338	0.617	0.03	0.128	101.353
Line 35 395_fa6	V6 395 m Fa.6	29.778	0	0.011	0	68.78	1.401	0.62	0	0.107	100.697
Line 36 395_fa6	V6 395 m Fa.6	29.437	0.029	0	0	69.122	1.363	0.593	0.016	0.114	100.703
Line 37 395_fa6	V6 395 m Fa.6	29.754	0.017	0	0	68.792	1.36	0.569	0.052	0.132	100.676
Line 38 395_fa6	V6 395 m Fa.6	29.202	0	0	0	68.664	1.376	0.613	0	0.125	99.99
Line 39 395_fa6	V6 395 m Fa.6	29.471	0.008	0	0.003	69.025	1.408	0.57	0.004	0.107	100.632
Line 40 395_fa6	V6 395 m Fa.6	29.624	0	0.005	0	68.456	1.365	0.548	0.007	0.137	100.164
Line 1 422 m Fa.3	V6 422m Fa.3	28.961	0	0	0	68.208	1.413	0.661	0	0.136	99.416
Line 2 422 m Fa.3	V6 422m Fa.3	28.919	0.033	0.011	0	68.909	1.443	0.626	0.006	0.143	100.143
Line 3 422 m Fa.3	V6 422m Fa.3	29.959	0	0.007	0	66.452	1.374	0.748	0	0.122	98.671
Line 4 422 m Fa.3	V6 422m Fa.3	29.185	0	0.004	0	69.013	1.396	0.643	0.013	0.13	100.386
Line 5 422 m Fa.3	V6 422m Fa.3	29.192	0	0	0.005	68.98	1.444	0.683	0.012	0.13	100.459
Line 6 422 m Fa.3	V6 422m Fa.3	28.951	0	0.015	0.006	68.826	1.518	0.635	0	0.138	100.135
Line 7 422 m Fa.3	V6 422m Fa.3	29.034	0.007	0.002	0	68.985	1.484	0.649	0	0.137	100.298
Line 8 422 m Fa.3	V6 422m Fa.3	29.249	0.007	0	0	69.376	1.363	0.672	0	0.151	100.848
Line 9 422 m Fa.3	V6 422m Fa.3	29.131	0.02	0.003	0.003	68.883	1.392	0.672	0	0.139	100.271
Line 10 422 m Fa.3	V6 422m Fa.3	29.171	0.023	0.007	0.017	69.182	1.406	0.686	0.011	0.148	100.657
Line 11 422 m Fa.31	V6 422m Fa.3	29.107	0	0	0	68.679	1.385	0.646	0.023	0.124	100.008
Line 12 422 m Fa.3	V6 422m Fa.3	29.012	0.018	0	0	69.195	1.405	0.645	0.005	0.122	100.402
Line 13 422 m Fa.3	V6 422m Fa.3	29.214	0	0	0.006	68.983	1.411	0.638	0	0.131	100.392
Line 14 422 m Fa.3	V6 422m Fa.3	29.162	0	0	0.01	68.619	1.382	0.688	0.017	0.13	100.037
Line 15 422 m Fa.3	V6 422m Fa.3	29.06	0	0.016	0	68.371	1.395	0.659	0	0.125	99.658
Line 16 422 m Fa.3	V6 422m Fa.3	29.082	0	0.004	0	69.214	1.365	0.622	0.027	0.151	100.465
Line 17 422 m Fa.3	V6 422m Fa.3	29.241	0.024	0.014	0.003	68.743	1.368	0.672	0	0.153	100.248
Line 18 422 m Fa.3	V6 422m Fa.3	29.085	0	0.011	0	68.747	1.476	0.623	0.011	0.151	100.104
Line 19 422 m Fa.3	V6 422m Fa.3	29.199	0	0	0	69.285	1.456	0.685	0.017	0.148	100.806
Line 20 422 m Fa.3	V6 422m Fa.3	29.144	0.025	0.013	0.016	69.087	1.447	0.656	0.026	0.114	100.549
Line 21 422 m Fa.3	V6 422m Fa.3	28.914	0.02	0	0	69.309	1.41	0.604	0	0.119	100.378
Line 22 422 m Fa.3	V6 422m Fa.3	28.869	0	0.023	0	69.099	1.365	0.678	0.036	0.14	100.223
Line 23 422 m Fa.3	V6 422m Fa.3	28.806	0.022	0.016	0	68.974	1.407	0.688	0	0.128	100.053
Line 24 422 m Fa.3	V6 422m Fa.3	29.016	0	0.008	0	69.268	1.424	0.628	0.008	0.147	100.502
Line 25 422 m Fa.3	V6 422m Fa.3	28.956	0	0	0	68.801	1.339	0.732	0.009	0.149	99.988
Line 26 422 m Fa.3	V6 422m Fa.3	28.972	0.002	0.004	0.007	68.609	1.464	0.677	0	0.153	99.905
Line 27 422 m Fa.3	V6 422m Fa.3	28.906	0	0.009	0.008	68.819	1.412	0.635	0	0.128	99.933
Line 28422 m Fa.3	V6 422m Fa.3	28.997	0.009	0	0.026	68.678	1.386	0.681	0	0.127	99.937
Line 29 422 m Fa.3	V6 422m Fa.3	28.932	0	0	0	68.647	1.414	0.704	0	0.137	99.852
Line 30 422 m Fa.3	V6 422m Fa.3	29.168	0	0	0	69.115	1.516	0.692	0	0.12	100.629
Line 31 422 m Fa.3	V6 422m Fa.3	29.893	0.003	0.009	0	68.693	1.386	0.658	0.016	0.109	100.791
Line 32 422 m Fa.3	V6 422m Fa.3	30.003	0	0	0	68.766	1.457	0.649	0	0.138	101.014
Line 33 422 m Fa.3	V6 422m Fa.3	29.632	0	0	0	68.753	1.428	0.648	0	0.138	100.635
Line 34 422 m Fa.3	V6 422m Fa.3	29.572	0	0.001	0	69.057	1.416	0.66	0	0.139	100.862
Line 35 422 m Fa.3	V6 422m Fa.3	28.903	0	0.014	0	68.373	1.458	0.673	0	0.145	99.584
Line 36 422 m Fa.3	V6 422m Fa.3	29.082	0	0	0	68.852	1.45	0.664	0	0.13	100.223
Line 37 422 m Fa.3	V6 422m Fa.3	29.297	0.013	0.005	0	68.909	1.43	0.614	0.004	0.126	100.412
Line 38 422 m Fa.3	V6 422m Fa.3	29.187	0.018	0.006	0	69.205	1.418	0.674	0	0.145	100.681
Line 39 422 m Fa.3	V6 422m Fa.3	29.332	0.004	0	0.006	68.98	1.424	0.704	0	0.12	100.603
Line 40 422 m Fa.3	V6 422m Fa.3	29.413	0	0	0.031	69.132	1.459	0.692	0	0.166	100.937
Line 1 422 m Fa.4	V6 422 m Fa.4	29.911	0	0	0	68.843	1.404	0.639	0	0.125	100.926
Line 2 422 m Fa.4	V6 422 m Fa.4	30.057	0	0.005	0.009	68.735	1.42	0.692	0.006	0.127	101.052
Line 3 422 m Fa.4	V6 422 m Fa.4	29.305	0	0	0.002	68.247	1.458	0.604	0.021	0.111	99.75
Line 4 422 m Fa.4	V6 422 m Fa.4	29.335	0	0	0	68.235	1.489	0.654	0.013	0.14	99.873
Line 5 422 m Fa.4	V6 422 m Fa.4	29.549	0.002	0.011	0	69.226	1.373	0.661	0.004	0.13	100.966
Line 6 422 m Fa.4	V6 422 m Fa.4	29.593	0	0	0	68.575	1.463	0.598	0	0.15	100.379
Line 7 422 m Fa.4	V6 422 m Fa.4	29.26	0.032	0.01	0	68.217	1.417	0.598	0	0.117	99.679
Line 8 422 m Fa.4	V6 422 m Fa.4	29.88	0	0	0	68.443	1.417	0.623	0	0.131	100.514
Line 9 422 m Fa.4	V6 422 m Fa.4	29.969	0	0.005	0	68.62	1.443	0.657	0.02	0.115	100.837
Line 10 422 m Fa.4	V6 422 m Fa.4	29.351	0.003	0.01	0.014	69.047	1.479	0.661	0	0.114	100.711
Line 11 422 m Fa.4	V6 422 m Fa.4	29.338	0.021	0	0.007	69.051	1.43	0.65	0.017	0.127	100.641
Line 12 422 m Fa.4	V6 422 m Fa.4	29.402	0	0	0	68.693	1.395	0.695	0	0.125	100.317
Line 13 422 m Fa.4	V6 422 m Fa.4	29.291	0	0.012	0	68.734	1.355	0.694	0.006	0.109	100.227
Line 14 422 m Fa.4	V6 422 m Fa.4	29.269	0.011	0	0	68.468	1.337	0.638	0	0.119	99.856
Line 15 422 m Fa.4	V6 422 m Fa.4	29.49	0	0.016	0	68.819	1.438	0.664	0	0.102	100.604
Line 16 422 m Fa.4	V6 422 m Fa.4	29.247	0	0.004	0	69.145	1.445	0.695	0	0.118	100.673
Line 17 422 m Fa.4	V6 422 m Fa.4	29.314	0	0.004	0	68.526	1.461	0.646	0	0.106	100.068
Line 18 422 m Fa.4	V6 422 m Fa.4	29.397	0.023	0	0	68.552	1.437	0.645	0	0.097	100.158
Line 19 422 m Fa.4	V6 422 m Fa.4	29.55	0	0.016	0.001	68.987	1.568	0.643	0	0.137	100.912
Line 20 422 m Fa.4	V6 422 m Fa.4	29.694	0	0.001	0.018	68.853	1.488	0.677	0	0.126	100.911
Line 21 422 m Fa.4	V6 422 m Fa.4	30.284	0.018	0	0	68.433	1.39	0.691	0.007	0.122	100.957
Line 22 422 m Fa.4	V6 422 m Fa.4	30.238	0	0.006	0.022	68.854	1.482	0.708	0	0.121	101.459
Line 23 422 m Fa.4	V6 422 m Fa.4	30.342	0	0	0	68.808	1.494	0.713	0.009	0.094	101.481
Line 24 422 m Fa.4	V6 422 m Fa.4	30.017	0	0.025	0.002	68.64	1.489	0.641	0.007	0.12	100.963
Line 25 422 m Fa.4	V6 422 m Fa.4	31.012	0	0	0	68.642	1.438	0.687	0.059	0.116	101.971
Line 26 422 m Fa.4	V6 422 m Fa.4	30.126	0.001	0.015	0	68.928	1.502	0.609	0	0.11	101.298
Line 27 422 m Fa.4	V6 422 m Fa.4	30.288	0	0.015	0.003	68.562	1.479	0.657	0.022	0.118	101.164
Line 28 422 m Fa.4	V6 422 m Fa.4	30.054	0	0.002	0.024	68.331	1.502	0.717	0	0.104	100.77
Line 29 422 m Fa.4	V6 422 m Fa.4	30.268	0.001	0.012	0.005	68.692	1.468	0.681	0	0.122	101.255
Line 30 422 m Fa.4	V6 422 m Fa.4	30.301	0	0.011	0	68.749	1.462	0.658	0	0.111	101.316
Line 1 570-fa4	V6 570 m Fa.4	29.174	0	0.001	0	68.804	1.227	0.421	0.025	0.098	99.761
Line 2 570-fa4	V6 570 m Fa.4	29.11	0.009	0.007	0	68.8	1.37	0.404	0.018	0.105	99.826
Line 3 570-fa4	V6 570 m Fa.4	28.985	0	0	0.003	68.248	1.358	0.49	0	0.101	99.185
Line 4 570-fa4	V6 570 m Fa.4	28.883	0.017	0.011	0	67.88	1.345	0.476	0.017	0.119	98.76
Line 5 570-fa4	V6 570 m Fa.4	28.985	0.008	0	0	68.482	1.331	0.466	0.012	0.138	99.422
Line 6 570-fa4	V6 570 m Fa.4	29.289	0	0.014	0.021	68.4	1.393	0.484	0.01	0.145	99.774
Line 7 570-fa4	V6 570 m Fa.4	29.675	0	0.007	0	68.773	1.345	0.441	0	0.108	100.358
Line 8 570-fa4	V6 570 m Fa.4	29.122	0	0	0	68.348	1.339	0.469	0	0.12	99.399
Line 9 570-fa4	V6 570 m Fa.4	28.709	0.071	0.016	0	68.328	1.358	0.466	0	0.111	99.062
Line 10 570-fa4	V6 570 m Fa.4	28.696	0	0	0	68.381	1.267	0.465	0	0.078	98.887
Line 11 570-fa4	V6 570 m Fa.4	28.834	0.011	0	0	68.174	1.384	0.466	0	0.111	98.987
Line 13 570-fa4	V6 570 m Fa.4	28.72	0	0	0	68.68	1.391	0.435	0	0.084	99.333
Line 14 570-fa4	V6 570 m Fa.4	29.418	0.007	0.009	0	68.95	1.297	0.454	0.011	0.109	100.27
Line 15 570-fa4	V6 570 m Fa.4	29.602	0.001	0.012	0.006	67.961	1.483	0.464	0.003	0.107	99.647
Line 16 570-fa4	V6 570 m Fa.4	28.993	0	0.001	0	68.919	1.358	0.456	0	0.126	99.853
Line 17 570-fa4	V6 570 m Fa.4	28.849	0.022	0.008	0	68.339	1.379	0.45	0.001	0.097	99.154
Line 18 570-fa4	V6 570 m Fa.4	28.398	0.014	0	0	68.511	1.29	0.442	0	0.128	98.783
Line 19 570-fa4	V6 570 m Fa.4	28.657	0	0	0	68.895	1.296	0.405	0	0.115	99.368
Line 20 570-fa4	V6 570 m Fa.4	28.789	0.001	0	0	68.637	1.094	0.385	0	0.11	99.016
Line 1 570-fa2	V6 570 m Fa.2	29.251	0	0	0	68.903	1.17	0.386	0	0.114	99.824
Line 2 570-fa2	V6 570 m Fa.2	29.872	0	0	0.021	69.26	1.239	0.342	0	0.094	100.835
Line 3 570-fa2	V6 570 m Fa.2	30.115	0.002	0	0	68.751	1.228	0.349	0	0.05	100.495
Line 4 570-fa2	V6 570 m Fa.2	29.436	0	0.016	0.007	68.986	1.248	0.36	0	0.08	100.133
Line 5 570-fa2	V6 570 m Fa.2	29.272	0.02	0	0	68.454	1.196	0.35	0.016	0.116	99.425
Line 6 570-fa2	V6 570 m Fa.2	29.409	0.015	0	0.003	68.794	1.14	0.31	0.009	0.098	99.778
Line 7 570-fa2	V6 570 m Fa.2	29.785	0	0.014	0	68.426	1.189	0.348	0.001	0.074	99.837
Line 8 570-fa2	V6 570 m Fa.2	29.968	0	0	0	68.841	1.236	0.321	0	0.092	100.478
Line 9 570-fa2	V6 570 m Fa.2	30.008	0	0	0.013	69.074	1.199	0.401	0.007	0.084	100.792
Line 10 570-fa2	V6 570 m Fa.2	29.833	0	0	0	68.977	1.197	0.362	0	0.113	100.485
Line 11 570-fa2	V6 570 m Fa.2	29.977	0	0	0.002	68.761	1.244	0.367	0	0.102	100.462
Line 12 570-fa2	V6 570 m Fa.2	29.879	0	0.007	0	68.243	1.195	0.362	0.015	0.102	99.803
Line 13 570-fa2	V6 570 m Fa.2	29.982	0	0	0	69.196	1.111	0.388	0.004	0.096	100.777
Line 14 570-fa2	V6 570 m Fa.2	29.998	0	0	0	69.521	1.143	0.396	0	0.105	101.163
Line 15 570-fa2	V6 570 m Fa.2	29.892	0	0	0	68.595	1.303	0.393	0.023	0.1	100.334
Line 1 605-fa5-fa1	V6 605 m Fa.5-Fa.1	30.02	0	0.013	0	68.144	1.569	0.492	0.021	0.233	100.501
Line 2 605-fa5-fa1	V6 605 m Fa.5-Fa.1	29.727	0	0.016	0	68.407	1.487	0.535	0.002	0.201	100.407
Line 3 605-fa5-fa1	V6 605 m Fa.5-Fa.1	30.074	0	0.005	0	68.098	1.532	0.551	0	0.201	100.47
Line 4 605-fa5-fa1	V6 605 m Fa.5-Fa.1	29.789	0.002	0.006	0	67.64	1.482	0.524	0.046	0.164	99.655
Line 5 605-fa5-fa1	V6 605 m Fa.5-Fa.1	29.77	0.029	0.03	0	67.94	1.462	0.525	0	0.152	99.908
Line 6 605-fa5-fa1	V6 605 m Fa.5-Fa.1	29.636	0	0.002	0	68.515	1.437	0.562	0	0.148	100.3
Line 7 605-fa5-fa1	V6 605 m Fa.5-Fa.1	29.456	0	0.006	0	68.189	1.542	0.545	0	0.206	99.944
Line 8 605-fa5-fa1	V6 605 m Fa.5-Fa.1	29.439	0	0.005	0	68.143	1.501	0.532	0	0.22	99.866
Line 9 605-fa5-fa1	V6 605 m Fa.5-Fa.1	29.416	0.004	0.011	0	67.362	1.491	0.516	0.013	0.282	99.095
Line 10 605-fa5-fa1	V6 605 m Fa.5-Fa.1	29.114	0	0.004	0.007	67.69	1.57	0.503	0.002	0.218	99.108
Line 1 605fa5fa2	V6 605 m Fa.5-Fa.2	29.422	0	0.012	0.013	68.152	1.422	0.489	0.015	0.195	99.72
Line 2 605fa5fa2	V6 605 m Fa.5-Fa.2	28.91	0	0	0.001	68.313	1.348	0.527	0.01	0.098	99.213
Line 3 605fa5fa2	V6 605 m Fa.5-Fa.2	29.154	0	0	0	68.466	1.405	0.512	0.002	0.091	99.63
Line 4 605fa5fa2	V6 605 m Fa.5-Fa.2	29.932	0	0	0.014	68.976	1.425	0.516	0	0.097	100.96
Line 5 605fa5fa2	V6 605 m Fa.5-Fa.2	29.785	0	0	0	68.611	1.429	0.514	0.017	0.144	100.5
Line 6 605fa5fa2	V6 605 m Fa.5-Fa.2	28.92	0	0	0	67.919	1.521	0.55	0.012	0.18	99.102
Line 7 605fa5fa2	V6 605 m Fa.5-Fa.2	28.977	0.011	0.007	0	67.998	1.576	0.517	0	0.326	99.412
Line 8 605fa5fa2	V6 605 m Fa.5-Fa.2	29.017	0	0.001	0	67.961	1.566	0.487	0.034	0.362	99.428
Line 9 605fa5fa2	V6 605 m Fa.5-Fa.2	30.832	0.029	0.021	NA	68.078	1.522	0.512	0	0.285	101.322
Line 1 605 FA6	V6 605 m Fa.6	30.386	0	0	NA	68.163	1.491	0.467	0	0.278	100.796
Line 2 605 FA6	V6 605 m Fa.6	30.894	0	0	NA	67.721	1.578	0.529	0	0.273	101.024
Line 3 605 FA6	V6 605 m Fa.6	30.428	0	0	NA	68.537	1.604	0.512	0.026	0.304	101.416
Line 4 605 FA6	V6 605 m Fa.6	32.097	0	0.018	NA	66.952	1.388	0.497	0	0.216	101.178
Line 5 605 FA6	V6 605 m Fa.6	30.43	0	0.021	NA	68.158	1.577	0.515	0	0.269	100.985
Line 6 605 FA6	V6 605 m Fa.6	30.65	0	0.015	NA	67.945	1.544	0.525	0.033	0.338	101.055
Line 7 605 FA6	V6 605 m Fa.6	30.416	0	0	NA	68.225	1.518	0.505	0	0.321	101.022
Line 8 605 FA6	V6 605 m Fa.6	30.529	0.028	0	NA	67.808	1.519	0.581	0	0.158	100.634
Line 9 605 FA6	V6 605 m Fa.6	30.582	0	0	NA	68.295	1.522	0.563	0	0.155	101.13
Line 10 605 FA6	V6 605 m Fa.6	30.29	0	0	NA	67.954	1.402	0.556	0	0.117	100.319
Line 11 605 FA6	V6 605 m Fa.6	30.441	0.009	0	NA	68.447	1.465	0.576	0	0.127	101.065
Line 12 605 FA6	V6 605 m Fa.6	30.44	0	0	NA	68.215	1.485	0.559	0.008	0.133	100.843
Line 13 605 FA6	V6 605 m Fa.6	30.646	0	0	NA	68.275	1.435	0.591	0.019	0.154	101.155
Line 14 605 FA6	V6 605 m Fa.6	30.266	0	0	NA	67.384	1.468	0.572	0	0.123	99.845
Line 15 605 FA6	V6 605 m Fa.6	29.872	0	0	NA	67.609	1.411	0.569	0	0.157	99.634
Line 16 605 FA6	V6 605 m Fa.6	30.298	0	0	NA	68.416	1.526	0.543	0.012	0.128	100.923
Line 17 605 FA6	V6 605 m Fa.6	30.586	0.005	0	NA	68.442	1.48	0.548	0.022	0.193	101.291
Line 18 605 FA6	V6 605 m Fa.6	30.425	0.017	0.011	NA	67.902	1.524	0.495	0.013	0.315	100.722
Line 19 605 FA6	V6 605 m Fa.6	30.515	0	0.019	NA	68.143	1.483	0.538	0	0.245	100.963
Line 20 605 FA6	V6 605 m Fa.6	30.579	0	0.016	NA	68.476	1.524	0.506	0	0.329	101.43
Line 1 fa6b-605m	V6 605 m Fa.6b	30.441	0	0.016	NA	68.944	1.574	0.519	0.014	0.314	101.822
Line 2 fa6b-605m	V6 605 m Fa.6b	30.311	0	0.012	NA	68.467	1.552	0.468	0.001	0.321	101.132
Line 3 fa6b-605m	V6 605 m Fa.6b	30.384	0	0	NA	68.661	1.493	0.539	0.023	0.235	101.367
Line 4 fa6b-605m	V6 605 m Fa.6b	30.373	0.025	0.004	NA	68.498	1.594	0.529	0.018	0.263	101.33
Line 5 fa6b-605m	V6 605 m Fa.6b	30.399	0.042	0.015	NA	68.771	1.534	0.527	0.026	0.225	101.551
Line 6 fa6b-605m	V6 605 m Fa.6b	29.631	0	0	0	68.178	1.619	0.499	0	0.361	100.288
Line 1 605-fa6c	V6 605 m Fa.6c	29.322	0	0.007	0	67.73	1.542	0.517	0	0.3	99.43
Line 2 605-fa6c	V6 605 m Fa.6c	29.489	0	0	0.002	68.052	1.52	0.555	0	0.321	99.949
Line 3 605-fa6c	V6 605 m Fa.6c	29.255	0	0.021	0	68.361	1.602	0.507	0.008	0.294	100.062
Line 4 605-fa6c	V6 605 m Fa.6c	29.245	0	0.009	0	68.76	1.572	0.541	0.005	0.272	100.41
Line 5 605-fa6c	V6 605 m Fa.6c	29.055	0	0.018	0	68.584	1.6	0.503	0	0.315	100.075
Line 6 605-fa6c	V6 605 m Fa.6c	29.07	0	0.003	0.001	68.227	1.562	0.493	0	0.304	99.669
Line 7 605-fa6c	V6 605 m Fa.6c	28.989	0	0.016	0	68.063	1.509	0.54	0	0.337	99.454
Line 8 605-fa6c	V6 605 m Fa.6c	29.658	0.021	0.029	0.015	68.257	1.589	0.485	0.001	0.32	100.375
Line 9 605-fa6c	V6 605 m Fa.6c	29.742	0.018	0	0	68.275	1.552	0.528	0	0.334	100.462
Line 10 605-fa6c	V6 605 m Fa.6c	29.515	0	0.022	0.028	68.381	1.489	0.575	0	0.256	100.291
Line 1 605-fa7	V6 605 m Fa.7	28.467	0	0.003	0	67.907	1.51	0.51	0.023	0.262	98.706
Line 2 605-fa7	V6 605 m Fa.7	28.66	0	0	0	67.944	1.549	0.535	0.001	0.269	98.958
Line 3 605-fa7	V6 605 m Fa.7	29.606	0	0	0	68.155	1.549	0.54	0.003	0.302	100.164
Line 4 605-fa7	V6 605 m Fa.7	30.103	0	0	0	67.722	1.486	0.556	0.014	0.326	100.207
Line 5 605-fa7	V6 605 m Fa.7	29.605	0	0.008	0	67.818	1.49	0.575	0.022	0.267	99.785
Line 6 605-fa7	V6 605 m Fa.7	28.781	0	0	0	67.948	1.562	0.557	0.009	0.26	99.117
Line 7 605-fa7	V6 605 m Fa.7	28.824	0	0	0	68.348	1.51	0.593	0	0.258	99.533
Line 8 605-fa7	V6 605 m Fa.7	28.883	0	0	0	68.408	1.54	0.534	0.005	0.246	99.616
Line 9 605-fa7	V6 605 m Fa.7	28.217	0	0.01	0	68.079	1.462	0.513	0	0.263	98.544
Line 10 605-fa7	V6 605 m Fa.7	29.321	0	0	0	67.793	1.474	0.556	0.018	0.292	99.454
Line 11 605-fa7	V6 605 m Fa.7	29.074	0	0.018	0	67.906	1.489	0.585	0	0.267	99.346
Line 12 605-fa7	V6 605 m Fa.7	29.7	0	0.001	0	68.097	1.509	0.528	0	0.279	100.128
Line 13 605-fa7	V6 605 m Fa.7	29.455	0.008	0	0	67.648	1.475	0.624	0.002	0.21	99.425
Line 14 605-fa7	V6 605 m Fa.7	28.38	0	0.001	0.002	68.192	1.496	0.541	0.013	0.237	98.874
Line 15 605-fa7	V6 605 m Fa.7	28.319	0	0.003	0.016	68.213	1.538	0.58	0.006	0.161	98.836
Line 16 605-fa7	V6 605 m Fa.7	28.165	0.046	0.02	0	67.855	1.469	0.585	0	0.171	98.334
Line 17 605-fa7	V6 605 m Fa.7	28.563	0	0.014	0	68.091	1.551	0.556	0	0.155	98.93
Line 18 605-fa7	V6 605 m Fa.7	28.635	0	0.017	0	67.98	1.426	0.575	0	0.162	98.795
Line 19 605-fa7	V6 605 m Fa.7	29.11	0	0.003	0	68.318	1.466	0.606	0.017	0.158	99.692
Line 20 605-fa7	V6 605 m Fa.7	29.058	0	0.008	0	68.035	1.389	0.622	0	0.164	99.276

## Sheet: G48417
Brandt, S., et al., 2021, Cumulate olivine: A novel host for heavy rare earth element mineralization: Geology, v. 49, https://doi.org/10.1130/G48417.1
